# Supplementary material for: Bacterial cellulose/TiO2 hybrid nanofibers prepared by the surface hydrolysis method with molecular precision
Source: Royal Society of Chemistry journal article supplement (doi:10.1039/b9nr00158a), 2009-11-11
Supplement: b9nr00158a.pdf [file b9nr00158a.pdf]

## Supporting Information

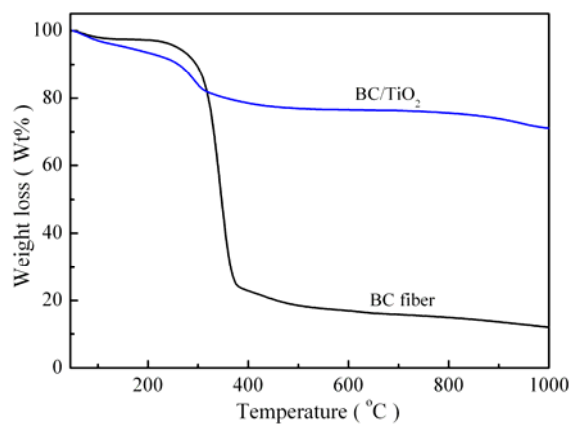

Figure S1. Thermogravimetric analysis curves for BC nanofibers and BC/TiO<sub>2</sub> hybrid nanofibers.

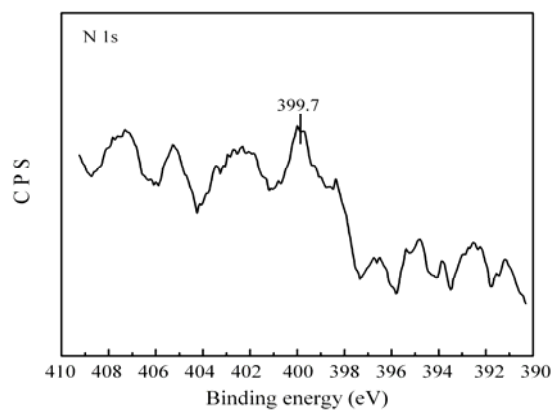

Figure S2. XPS spectrum of a N-doped BC/TiO<sub>2</sub> nanofiber sample.
